# Supplementary material
Source: PubMed Central journal article supplement (PMC3707676)

### Supplemental data

**FIGURE S1.** Knock down of MCM7 does not affect S phase progression. A, B. HeLa cells were transfected with MCM7 siRNA or control siRNA and synchronized at G1 phase. Then the cells were released for 3 h and 6 h respectively. The cell lysates were immunoblotted with MCM7 antibody (A). The cells were also collected for flow cytometry analysis (B, left) and the percentage of S phase cells was calculated (B, right).

A

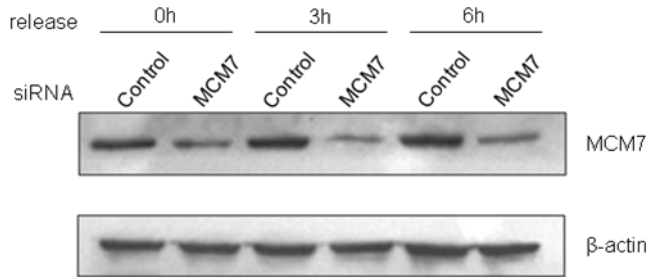

B

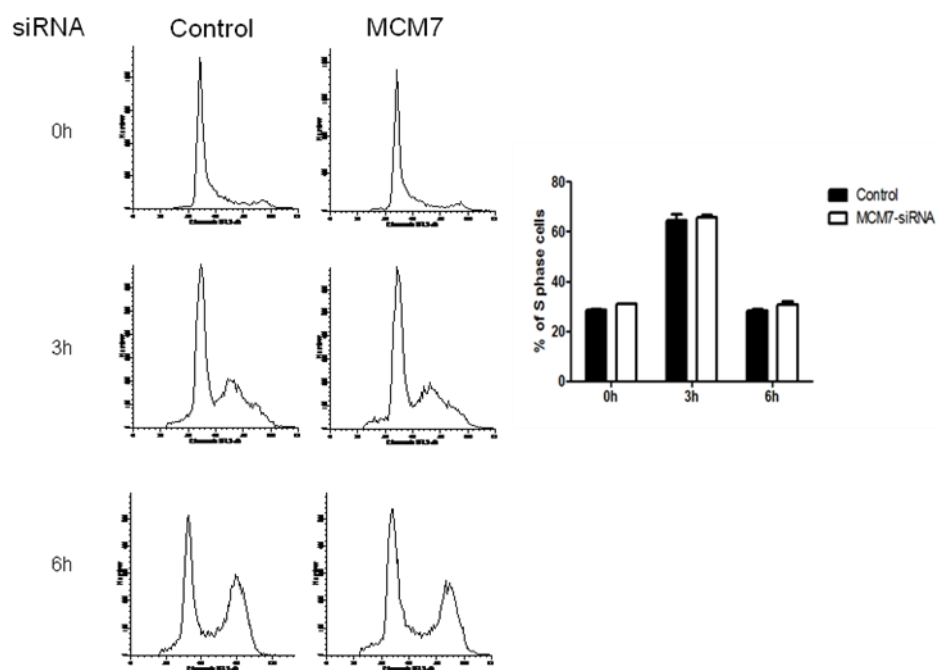

Supplement: supp_M112.449652_jbc.M112.449652-1.pdf [file supp_M112.449652_jbc.M112.449652-1.pdf]
